# Supplementary material
Source: Springer Nature journal article supplement (https://www.springermedizin.de/resource/supplementary/12936_2011_1918_MOESM18_ESM.pdf/9541982)

Incidence/1000 person years

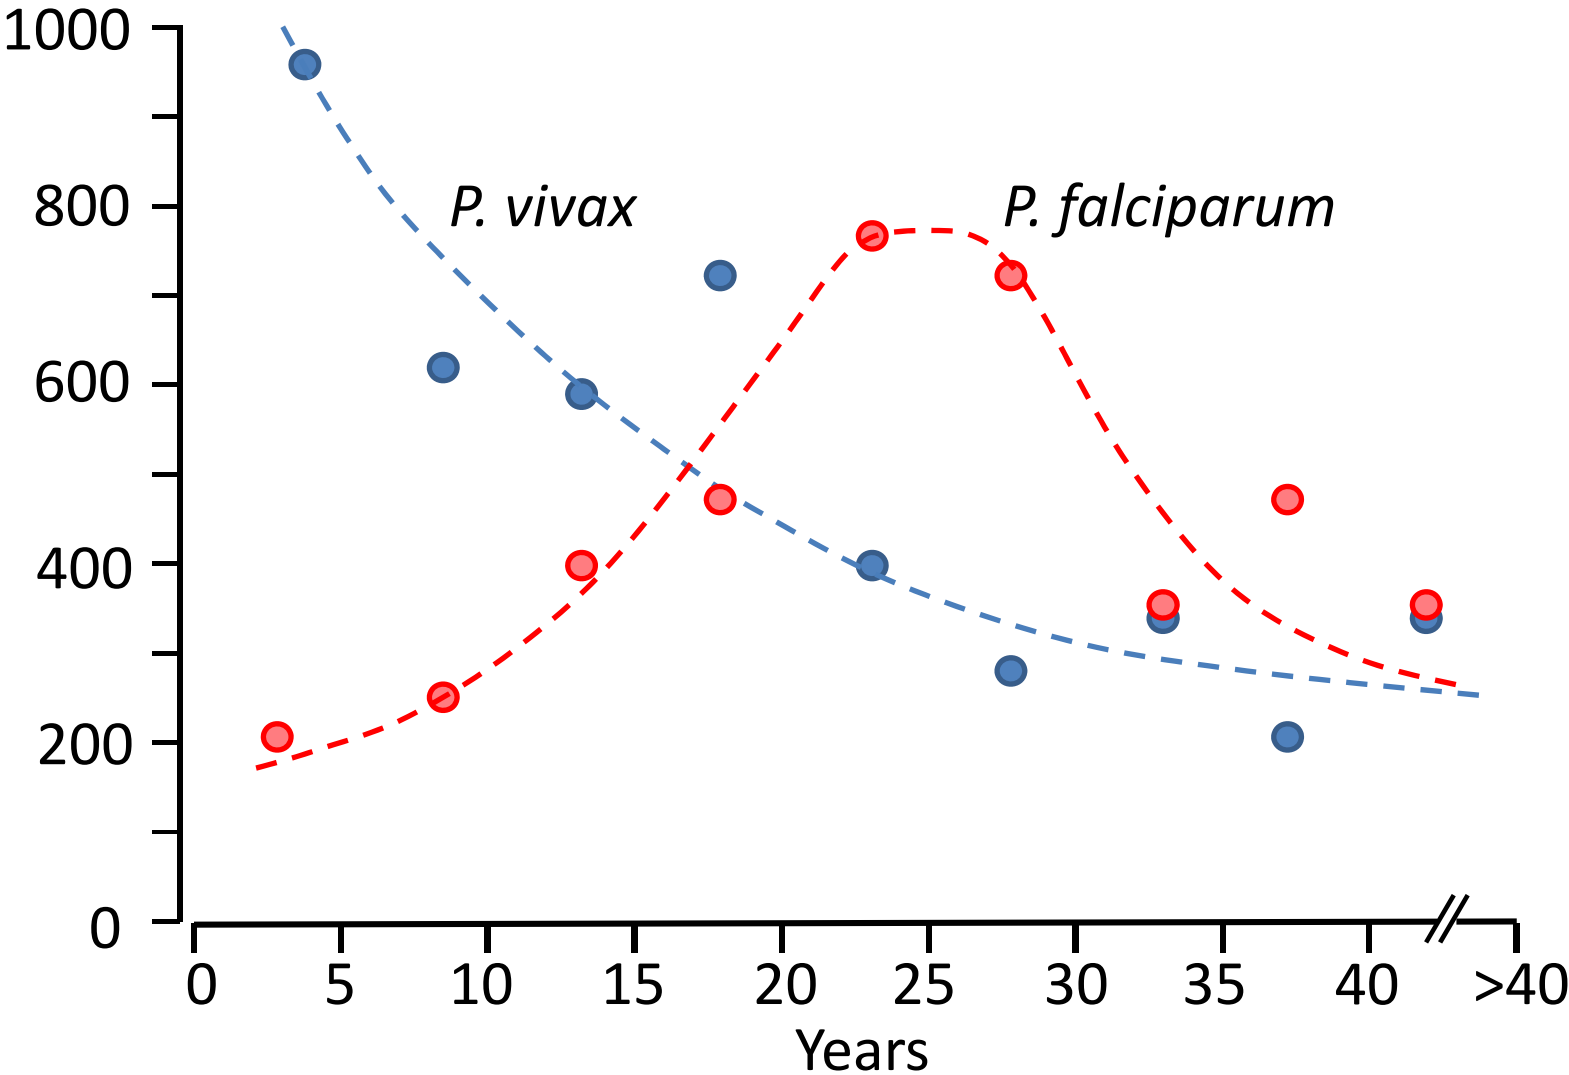

Supplement: MOESM18 [file 9541982]
